# Supplementary material for: Gallic Acid: A Natural Phenolic Compound Exerting Antitumoral Activities in Colorectal Cancer via Interaction with G-Quadruplexes
Source: MDPI journal article supplement (doi:10.3390/cancers14112648), 2022-05-26
Supplement: s1 [file s1]

Supplementary Materials

# Gallic Acid: A Natural Phenolic Compound Exerting Antitumoral Activities in Colorectal Cancer via Interaction with G-Quadruplexes

Victoria Sanchez-Martin<sup>1,2,3</sup>, María del Carmen Plaza-Calonge<sup>1</sup>, Ana Soriano-Lerma<sup>1,4</sup>, Matilde Ortiz-Gonzalez<sup>1,5</sup>, Angel Linde-Rodriguez<sup>1,2</sup>, Virginia Perez-Carrasco<sup>1,2</sup>, Inmaculada Ramirez-Macias<sup>1,2</sup>, Marta Cuadros<sup>1,3</sup>, Jose Gutierrez-Fernandez<sup>2</sup>, Javier Murciano-Calles<sup>6</sup>, Juan Carlos Rodríguez-Manzanque<sup>1</sup>, Miguel Soriano<sup>1,5,†</sup> and Jose Antonio Garcia-Salcedo<sup>1,2,\*,†</sup>

**Table S1.** List of all antibodies and respective dilutions used for immunofluorescence (IF) and western blot (WB) experiments in this study.

| Name                                    | Comercial Reference                 | Study | Dilution |
|-----------------------------------------|-------------------------------------|-------|----------|
| BG4                                     | NA                                  | IF    | 20 nM    |
|                                         |                                     | WB    | -        |
| Mouse $\alpha$ -nucleolin               | Invitrogen (39-6400)                | IF    | 1:100    |
|                                         |                                     | WB    | -        |
| Rabbit $\alpha$ -fibrillarin            | Abcam (ab5821)                      | IF    | 1:100    |
|                                         |                                     | WB    | -        |
| Mouse $\alpha$ -POLR1A                  | Santa Cruz Biotechnology (sc-48385) | IF    | 1:100    |
|                                         |                                     | WB    | 1:100    |
| Mouse $\alpha$ -FLAG                    | Sigma Aldrich (F1804)               | IF    | 1:1000   |
|                                         |                                     | WB    | -        |
| Rabbit $\alpha$ -gH2AX                  | Cell Signaling Technology (9718)    | IF    | -        |
|                                         |                                     | WB    | 1:800    |
| Mouse $\alpha$ -actin                   | Sigma Aldrich (A5441)               | IF    | -        |
|                                         |                                     | WB    | 1:5000   |
| Goat $\alpha$ -mouse Alexa Fluor 488    | Invitrogen (A-11001)                | IF    | 1:500    |
|                                         |                                     | WB    | -        |
| Donkey $\alpha$ -rabbit Alexa Fluor 555 | Invitrogen (A-31572)                | IF    | 1:1000   |
|                                         |                                     | WB    | -        |
| Goat $\alpha$ -mouse HRP conjugated     | Promega (W4021)                     | IF    | -        |
|                                         |                                     | WB    | 1:2500   |
| Donkey $\alpha$ -rabbit HRP conjugated  | Invitrogen (SA1-200)                | IF    | -        |
|                                         |                                     | WB    | 1:2500   |

**Table S2.** List of all forward (FW) and reverse (RV) primers and respective sequences used for qRT-PCR in this study. Supplementary.

| Name  |    | Sequence (5'→3')             |
|-------|----|------------------------------|
| 5'ETS | FW | GTGCGTGTGTCAGGCGTTCT         |
|       | RV | GGGAGAGGAGCAGACGAG           |
| ACTIN | FW | TGCGTCTGGACCTGGCTGGC         |
|       | RV | GCCTCAGGGCAGCGGAACCG         |
| BCL2  | FW | CTGCACCTGACGCCCTTCACC        |
|       | RV | CACATGACCCCAACCGAACTCAAAGA   |
| CMYB  | FW | ACCATGACTATGATGGGCTGC        |
|       | RV | TCCCAAGTGACGCTTCC            |
| CMYC  | FW | CGTCCTCGGATTCTCTGCTC         |
|       | RV | GCCTGCCTCTTTCCACAGA          |
| KRAS  | FW | GACTGAATATAAACTTGTGGTAGTTGGA |
|       | RV | CATATTCGTCCACAAAATGATTCTG    |
| VEGFA | FW | CTACCTCCACCATGCCAAGT         |
|       | RV | GCAGTAGCTGCGCTGATAGA         |

**Table S3.** Sequences of G4-containing oligonucleotides used for fluorescence intercalator displacement assay, PCR-stop assay, circular dichroism experiments and UV-visible spectroscopy.

| G4-oligonucleotides for FID Assay      |    |                                                 |
|----------------------------------------|----|-------------------------------------------------|
| Name                                   |    | Sequence (5'→3')                                |
| 5'ETS                                  |    | GGGGGCGGGTGGTTGGG                               |
| BCL2                                   |    | TAGGGGCGGGCGGGAGGAAGGGGCGGGAGCGGGGCTG           |
| CMYB                                   |    | TAGGAGGAGGAGGTCACGGAGGAGGAGGAGAAGGAGGAGGAGGAAA  |
| CMYC                                   |    | GGGGCGCTTATGGGGAGGGTGGGGAGGGTGGGGAAGGTGGGGAGGAG |
| KRAS                                   |    | TAGGGCGGTGTGGGAAGAGGGAAGAGGGGGAGGCAG            |
| VEGFA                                  |    | GGGGCGGGCCGGGGCGGGG                             |
| TEL                                    |    | TAGGGTTAGGGTTAGGGTTAGGGT                        |
| G4-oligonucleotides for PCR-stop assay |    |                                                 |
| Name                                   |    | Sequence (5'→3')                                |
| 5'ETS                                  | FW | TCGCGTGGGGGGCGGGTGGTTGGG                        |
|                                        | RV | TTCTCGTCCCAACCAC                                |
| CMYC                                   | FW | GGGGCGCTTATGGGGAGGGTGGGGAGGGTGGGGAAGGTGGGGAGGAG |
|                                        | RV | TTCTCGTCTCCTCCCC                                |
| G4-oligonucleotides for CD spectra     |    |                                                 |
| Name                                   |    | Sequence (5'→3')                                |
| 5'ETS                                  |    | GGGGGCGGGTGGTTGGG                               |
| CMYC                                   |    | TGGGGAGGGTGGGGAGGGTGGGGAAGG                     |
| G4-oligonucleotides for UV-vis spectra |    |                                                 |
| Name                                   |    | Sequence (5'→3')                                |
| 5'ETS                                  |    | GGGGGCGGGTGGTTGGG                               |
| CMYC                                   |    | TGGGGAGGGTGGGGAGGGTGGGGAAGG                     |

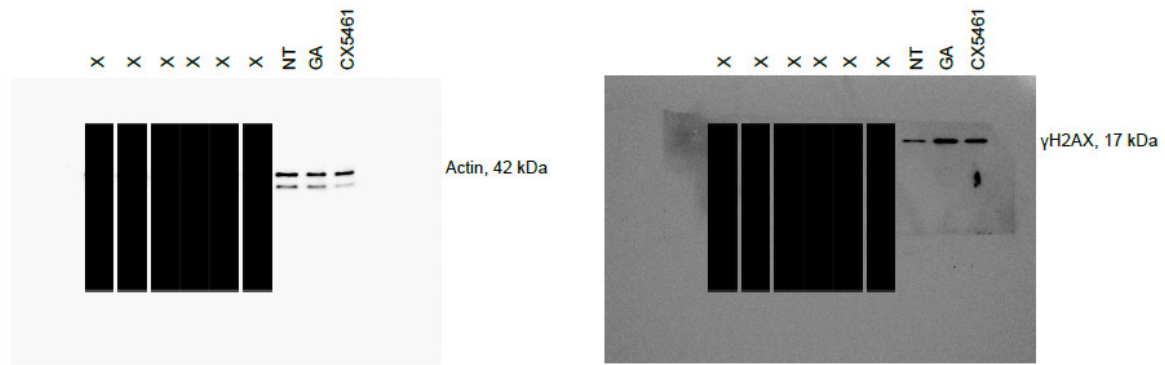

Densitometry readings

|             | NT         | GA         | CX5461     |
|-------------|------------|------------|------------|
| Actin       | 42,230.773 | 32,234.409 | 38,869.723 |
| γH2AX       | 11,712.208 | 38,832.957 | 44,721.522 |
| γH2AX/Actin | 0.2773     | 1.2047     | 1.1505     |

**Figure S1.** Uncropped Western blot in SW480 cells upon treatment with vehicle (NT), GA IC<sub>50</sub> or CX5461 10 μM for 6 h to determine protein levels of γH2AX as a marker of DNA damage and actin as housekeeping gene. Supplementary

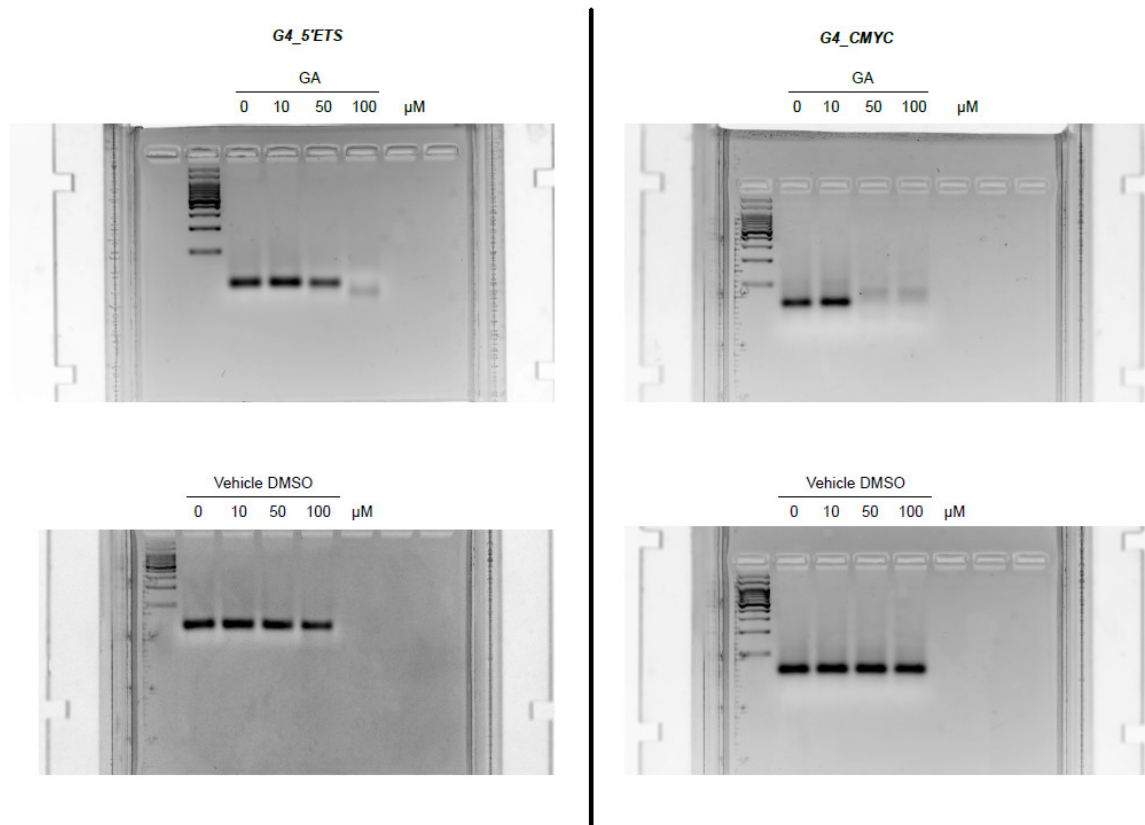

**Figure S2.** Uncropped gel from a PCR-stop assay including the G4-containing oligonucleotide of 5'ETS and CMYC with increasing concentrations of GA or the corresponding vehicle DMSO.

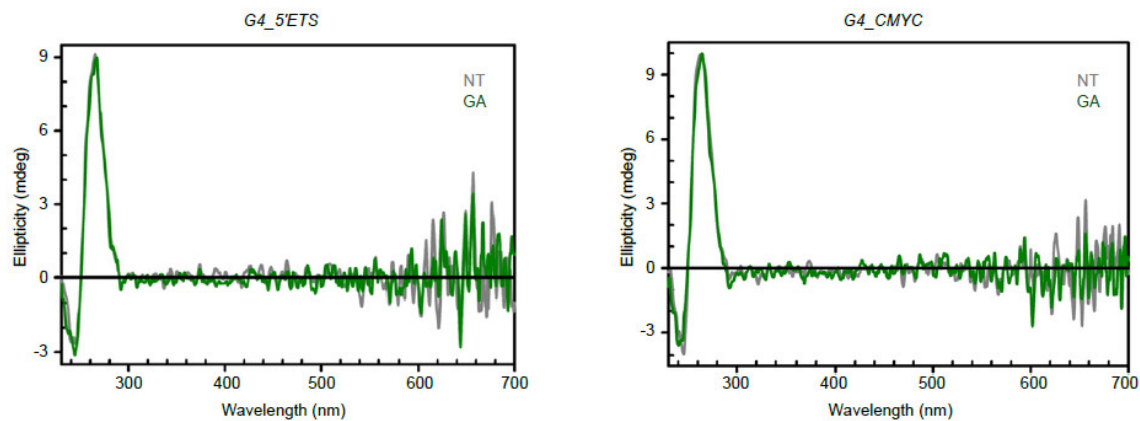

**Figure S3.** Full CD spectra of the G4s formed by 5'ETS and CMYC in the absence (gray) or presence (green) of GA 100  $\mu$ M.
